# Supplementary material for: The Nogo-C2/Nogo Receptor Complex Regulates the Morphogenesis of Zebrafish Lateral Line Primordium through Modulating the Expression of dkk1b, a Wnt Signal Inhibitor
Source: PubMed Central journal article supplement (PMC3897714; doi:10.1371/journal.pone.0086345), 2014-01-21
Supplement: pone.0086345.s001.pdf [file pone.0086345.s001.pdf]

**A**

zP75 : -----MFTVT---VVELLVCEALS-SRDTCPSCAFITTRGECCKCQCEGEMVVKPCGANQTVCEPCLDSFTFSENFSHKDKLIPCTCCSEIMRML : 85  
 hp75 : MG-AGATGRAMDGR--LLLILLVSLGGAKEACPTGLYTHSGECCKRACNLGEGVAQPCGANQTVCEPCLDSVFFSDVVSATEFGKPCTECVGLQSMS : 96  
 mp75 : MRRAGAACSAMDRLRLLLLLLVSVFGGAKETCTGMYTHSGECCKRACNLGEGVAQPCGANQTVCEPCLDSVFFSDVVSATEFGKPCTECVGLQSMS : 99

**Signal peptide** **CRD 1** **CRD 2**

zP75 : TPCITANDALCVQYGFNQLSGRCEACTVCPVGCQVQVCFNFERDTVCKECEDITYSDQDTSFDPCPLCTVGDQPEMEVKSCTFVSDAVCQDFLAPN : 184  
 hp75 : APCVEADAVCRCAQYGYQDETTGRCEACRVCVCEAGSGLVFSQDQKQNTVCEPCPDGTYSEANHVDPCLPCTVCEEDTQRQLRCECTRWALCAECEIIPGRW : 195  
 mp75 : APCVEADAVCRCAQYGYQDETTGRCEACRVCVCEAGSGLVFSQDQKQNTVCEPCPECTYSIEANHVDPCLPCTVCEEDTQRQLRCECTRWALCAECEIIPGRW : 198

**CRD 2** **CRD 3** **CRD 4**

zP75 : SSPSPSAPPEPTPYFTFSPSIHKFSSHPGSVVSYTEKLLPDNPEESVTTTDEGQRRLHGLSDNLIPIYTSILAAVLLGLVAFIIFKRWNSCKQNKCANNR : 283  
 hp75 : ITRS---TPEEGSDTAPSTQPEAF--PEQDLIASTVAGVVTVMGSSQFVVTR--GTDNLIPIYVCSILAAVVVGLVAVIAFKRWNSCKQNKCGAN-- : 286  
 mp75 : ITRS---TPEEGSDVTTPESTQPEAF--PERDLIASTVADVTVMGSSQFVVTR--GTDNLIPIYVCSILAAVVVGLVAVIAFKRWNSCKQNKCGAN-- : 289

**transmembrane domain**

zP75 : ACSANPSQTFSPPEGEKLSHSDSGISVDSQSLHDCGPPHTV----VKIDGGSALSLELHTREEVEKLLNRTEGEEESAANEETDWCSLAGLGLYKEEHIA : 378  
 hp75 : --SRPVNQTFFPEGEKLSHSDSGISVDSQSLHDCGPPHTQTAGGQALKGDGGLYSSLEFARREEVEKLLNGS-----AGDTRHRLAGLGLYQPEHID : 374  
 mp75 : --SRPVNQTFFPEGEKLSHSDSGISVDSQSLHDCGPPHTQTAGGQALKGDGGLYSSLELHTREEVEKLLN-----GDTWRHLAGLGLYQPEHID : 374

**death domain**

zP75 : NFKQDERFICALLSHWASQDSANITLCTALKINREDAQSIIIVKFTATSAV : 431 Identity Similarity  
 hp75 : SETHACFVRALLASWATQDSATLQALLAALRRICRADLVESLCSESTATSEV : 427 45% 61%  
 mp75 : SETHACFVRALLASWAGQDSATLQALLAALRRICRADLVESLCSESTATSEV : 427 45% 61%

**B**

zLINGO-1 : MTFLLQVTIKMVAR-EASGHSYLVACQPIILITMLGTVLSSGATGCFPSRCECSAQCFRSVVCHRRKRLITPEGIEIDTRLLDLISKNRIL : 85  
 hLINGO-1 : ---MQVSKRMLAGGVRSMSEFLLACQPIILITMLGTVLSSGATGCFPSRCECSAQCFRAVLCHRKRFRVAVPEGIETETRLLDLIGKNRI : 83  
 mLINGO-1 : ---MIAGGRSMSEFLLACQPIILITMLGTVLSSGATGCFPSRCECSAQCFRAVLCHRKRFRVAVPEGIETETRLLDLIGKNRI : 77

**Signal peptide** **LRR N-cap** **LRR**

zLINGO-1 : KAINPEEELNYFQLEDLQLNENIISVIEPGAISNLLGLRITLGLRNNLKLKILGVFTGLSNLTRLDISENKIVILLDYMFOQLYNI : 171  
 hLINGO-1 : KTLNQDEEASFFLEELLENENIVSAVEPGAENNLFNRLTGLRNNLKLKILGVFTGLSNLTKLDISENKIVILLDYMFOQLYNI : 169  
 mLINGO-1 : KTLNQDEEASFFLEELLENENIVSAVEPGAENNLFNRLTGLRNNLKLKILGVFTGLSNLTKLDISENKIVILLDYMFOQLYNI : 163

**LRR**

zLINGO-1 : KLELVGNDLVYIISHRAFSGINSLEQLTLEKCNLTSIPEALSHLHGLIVLRLRHLNINAIIRDYSEFRRLYRLVLEISHWYFLDTM : 257  
 hLINGO-1 : KLELVGNDLVYIISHRAFSGINSLEQLTLEKCNLTSIPEALSHLHGLIVLRLRHLNINAIIRDYSEFRRLYRLVLEISHWYFLDTM : 255  
 mLINGO-1 : KLELVGNDLVYIISHRAFSGINSLEQLTLEKCNLTSIPEALSHLHGLIVLRLRHLNINAIIRDYSEFRRLYRLVLEISHWYFLDTM : 249

**LRR**

zLINGO-1 : TAKSLHGLNITLSTITNCNLTAVPYVAIQHLVYLRFNLSFNPTIEVVEGKMHNLRLQAFHLVGGRTVSIIEPYSFKGLNYLRVNL : 343  
 hLINGO-1 : TPNCLYGLNLTSLSTITNCNLTAVPYLAVRHLVYLRFNLSYNPTIEGSMLEHLRLQEIQLVGGQAVVEPYAFRGLNYLRVNL : 341  
 mLINGO-1 : TPNCLYGLNLTSLSTITNCNLTAVPYLAVRHLVYLRFNLSYNPTIEGSMLEHLRLQEIQLVGGQAVVEPYAFRGLNYLRVNL : 335

**LRR**

zLINGO-1 : VSNSTLSTLEESA FHSVGNLETLITLDSNPLACDCRLLWVFRWRRLNFRNQPFQATPEFVQGEKFKDFPDVILPNYFTCQKSKTR : 429  
 hLINGO-1 : VSGNQLTLEESA FHSVGNLETLITLDSNPLACDCRLLWVFRWRRLNFRNQPFQATPEFVQGEKFKDFPDVILPNYFTCRRRARTR : 427  
 mLINGO-1 : VSNQLTLEESA FHSVGNLETLITLDSNPLACDCRLLWVFRWRRLNFRNQPFQATPEFVQGEKFKDFPDVILPNYFTCRRRARTR : 421

**LRR** **LRR C-cap**

zLINGO-1 : EKAIHRFVDEGTVQVFCRAGDGEFEAILNLSPKHLVSAKSNGLRITVFDGTELVRYACVQDNGTYLCLIAANAGGNSMPFAHLH : 515  
 hLINGO-1 : EKAAQVVFVDEGTVQVFCRAGDGEFEAILNLSPKHLVSAKSNGLRITVFDGTELVRYACVQDNGTYLCLIAANAGGNSMPFAHLH : 513  
 mLINGO-1 : EKAAQVVFVDEGTVQVFCRAGDGEFEAILNLSPKHLVSAKSNGLRITVFDGTELVRYACVQDNGTYLCLIAANAGGNSMPFAHLH : 507

**Ig domain**

zLINGO-1 : VHSYSEWPHQPNKTFAFILNQFSDNSANGTCAMDFPFDMKPLTIATTMGFISFLGVVLFCLVLLFLWSRGKGNTRKNIEIEYVE : 601  
 hLINGO-1 : VRSYSEWPHQPNKTFAFISNOFGEGEANSRATVPPFFDIKTLTIATTMGFISFLGVVLFCLVLLFLWSRGKGNTRKNIEIEYVE : 599  
 mLINGO-1 : VRSYSEWPHQPNKTFAFISNOFGEGEANSRATVPPFFDIKTLTIATTMGFISFLGVVLFCLVLLFLWSRGKGNTRKNIEIEYVE : 593

**transmembrane domain**

zLINGO-1 : RRVDGENSPNEGSHKISMKMI : 622 Identity Similarity  
 hLINGO-1 : RRS DAGTSSADAPRKFNMKMI : 620 72% 86%  
 mLINGO-1 : RRS DAGTSSADAPRKFNMKMI : 614 71% 85%

**C**

zTROY : MPQAQILSRFPQLRILILEL CVLFAVMAFERDCRREOEYKDFKFSGIFCRQDAGCELSKECGFGYGEDAQCVECRASRFKEERSLQKC : 89  
 hTROY : MALKVLLLEQKTFFTLLVLLGYLSCKVTCBSGDCRQOEFRRDRSGNCVPCNQGGFVELSKECGFGYGEDAQCVECTRLHRFKEDWGFQKC : 89  
 mTROY : MALKVLP LHRTVLAAILLHLACKVSCBTGDCRQOEFRRDRSGNCVPCNQGGFVELSKECGFGYGEDAQCVECRPRFKEDWGFQKC : 89

**Signal peptide** **CRD 1** **CRD 2**

zTROY : KPCIDCSLNNRFCKGNCSTNNNAVCGDCLPGFYRKTKLIGFQDMECI PCGDP PPPPYE FHCASKVNLVKIASTASSPRDTALAAVICSAL : 178  
 hTROY : KPCIDCAVNNRFCKANCSATSDAICGDCLPGFYRKTKLIGFQDMECI PCGDP PPPPYE FHCASKVNLVKIASTASSPRDTALAAVICSAL : 178  
 mTROY : KPGADCALVNNRFCKANCSATSDAVCGDCLPGFYRKTKLIGFQDMECI PCGDP PPPPYE FHCASKVNLVKIASTASSPRDTALAAVICSAL : 178

**CRD 2** **CRD 3**

zTROY : ATVLLALFILCVIYCKRQLLEKKE--VSMRAHEGPFILGSELSCLDR-RVLELSQRFCCCHCTHSEEQTCGGVQLVSSVCCEDVWSQNRNRD : 265  
 hTROY : ATVLLALFILCVIYCKRQFMKKPSWLSRSQDIQYNGSELSCLDFRQPLRHCARACQYHRD SAPMYGPFVHLIFSLCCEEARSSARAVL : 267  
 mTROY : ATVLLALFILCVIYCKRQFMKKPSWLSRSQDIQYNGSELSCLDFRQPLRHCARACQYHRD SAPMYGPFVHLIFSLCCEEARSSARAVL : 267

**transmembrane domain**

zTROY : APAFHSHCRISDN----GRLTNESVGSQTDMACAP-DEVWPLVC-----SRRTDLSIQTNQRCSCEEEDEEVQIS : 331  
 hTROY : GCGVHSAASLQARNAGPAGEMVPTFFGSLTQSIICGFSDAWPI MGNPMGGDNISFCDSYPELTGEDHISINPELESSTSLDSNSSQDLV : 356  
 mTROY : GCGLRSPTTLQERNPASVGDTMPAFFGVSRSICAEFSDAWPI MGNPLGGD-SSLDSYPELTGEDHISINPENESAASLDSSSGGQDLA : 355

zTROY : D-----QRTAEPEPDAASHKPE-----LIQTTDTEG----- : 356 Identity Similarity  
 hTROY : GGAVPVQSHSENTFAATDLSTRYNT--LVESASTQDALTRMSQLDQESGAVIHPATQTSLQEA : 417 43% 56%  
 mTROY : G--TAALESSGNVSESTDSFRHGDGTGVWEQTLAQDAQRTPSQGGWEDRENINLAMPTAFQDA : 416 42% 56%

Figure S1
