# Supplementary material for: The Nogo-C2/Nogo Receptor Complex Regulates the Morphogenesis of Zebrafish Lateral Line Primordium through Modulating the Expression of dkk1b, a Wnt Signal Inhibitor
Source: PubMed Central journal article supplement (PMC3897714; doi:10.1371/journal.pone.0086345), 2014-01-21
Supplement: pone.0086345.s002.pdf [file pone.0086345.s002.pdf]

Scheme of the pCMV-GFP reporter plasmid

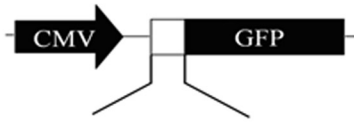

Perfect or mismatched target sequence of MO

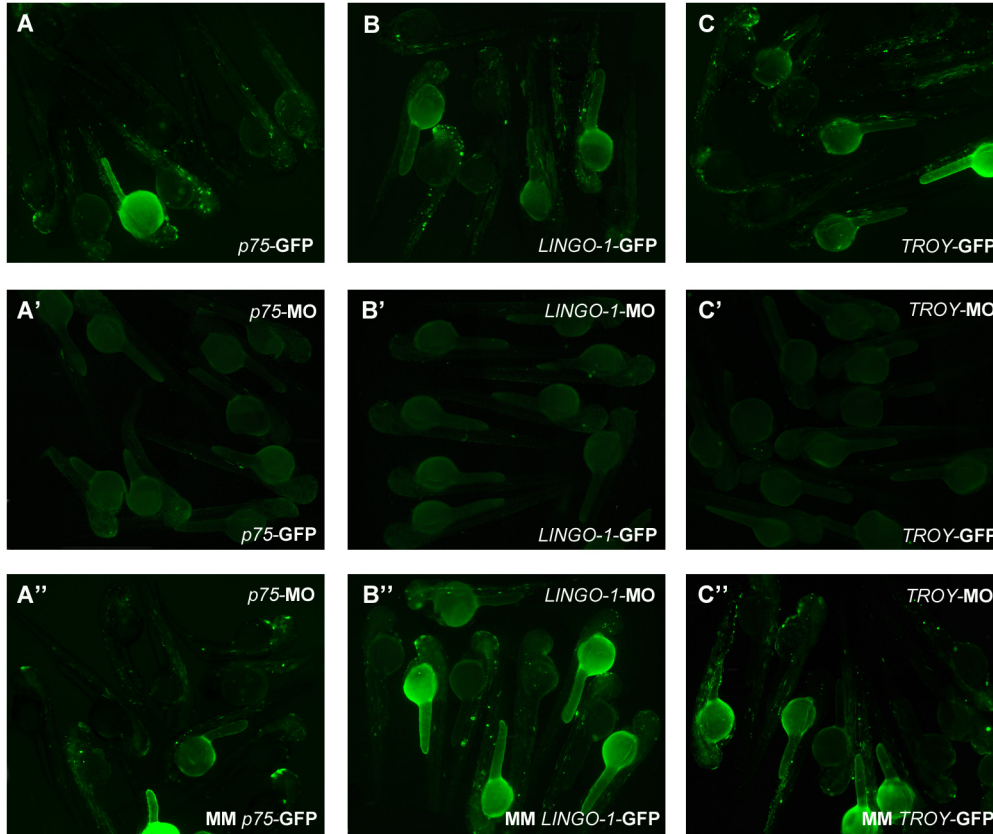

Figure S2
