# Supplementary material for: The Nogo-C2/Nogo Receptor Complex Regulates the Morphogenesis of Zebrafish Lateral Line Primordium through Modulating the Expression of dkk1b, a Wnt Signal Inhibitor
Source: PubMed Central journal article supplement (PMC3897714; doi:10.1371/journal.pone.0086345), 2014-01-21
Supplement: pone.0086345.s003.pdf [file pone.0086345.s003.pdf]

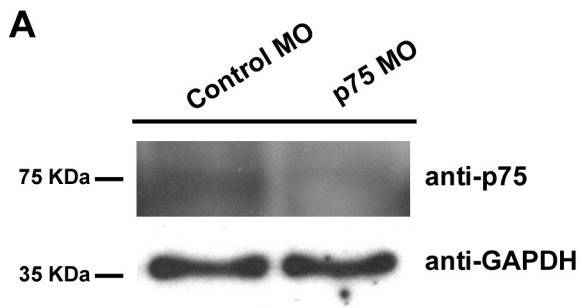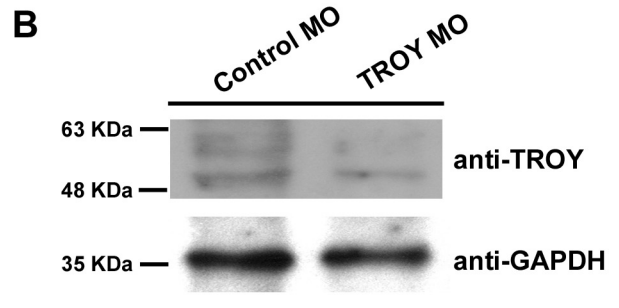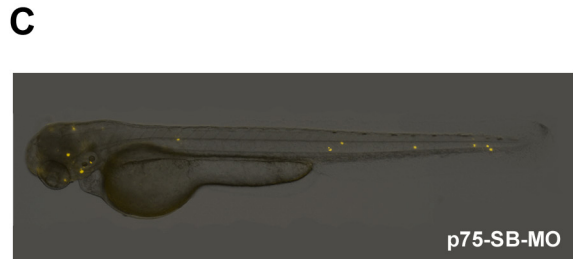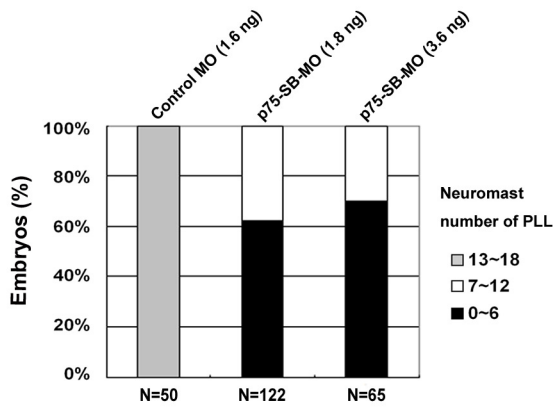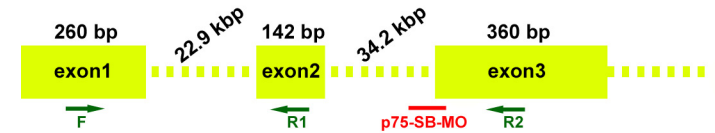

Sequences of p75-SB-MO and primers used in RT-PCR.

|           |                                 |
|-----------|---------------------------------|
| p75-SB-MO | 5'-AACGTCTCACCTGAGGACAGAAGGA-3' |
| primer-F  | 5'-CAGCACTCAGGTCCACTATTGCTC-3'  |
| primer-R1 | 5'-ACACGGTTCACACACTGTCTGC-3'    |
| primer-R2 | 5'-AAGGCATCATTGGCATCCGTGCAG -3' |

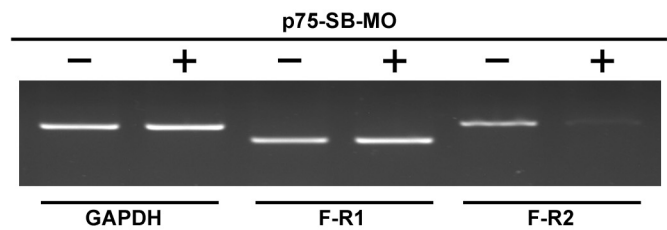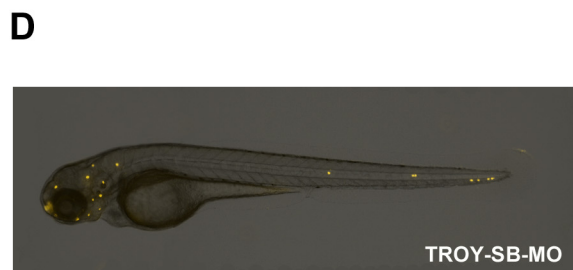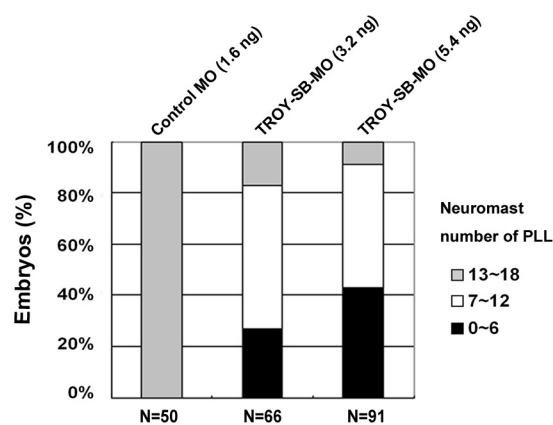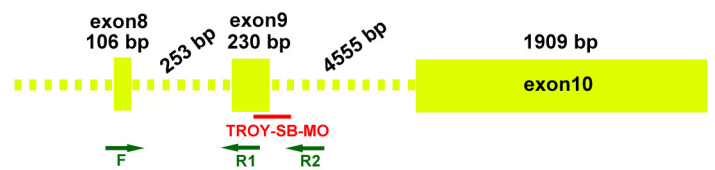

Sequences of TROY-SB-MO and primers used in RT-PCR.

|            |                                 |
|------------|---------------------------------|
| TROY-SB-MO | 5'-GCTCTGATGTTTGCTGACCTTCAGT-3' |
| primer-F   | 5'-GGCGTTCAGCTGGTGTCTGCTG-3'    |
| primer-R1  | 5'-GACTGCCACCGACTCGTTCTG-3'     |
| primer-R2  | 5'-GACAGCAGCACAAAAACACCCGC-3'   |

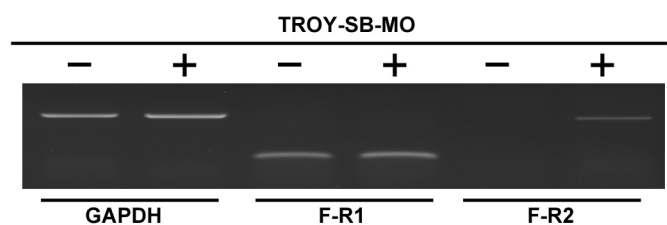

**Figure S3**
