# Supplementary material for: The Nogo-C2/Nogo Receptor Complex Regulates the Morphogenesis of Zebrafish Lateral Line Primordium through Modulating the Expression of dkk1b, a Wnt Signal Inhibitor
Source: PubMed Central journal article supplement (PMC3897714; doi:10.1371/journal.pone.0086345), 2014-01-21
Supplement: pone.0086345.s005.pdf [file pone.0086345.s005.pdf]

**A**

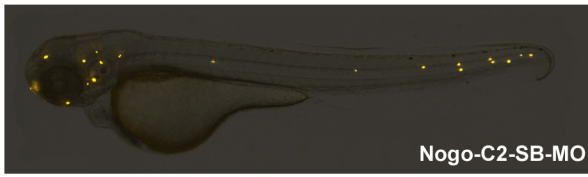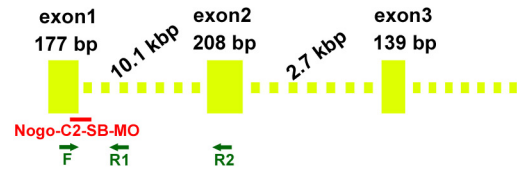

Sequences of Nogo-C2-SB-MO and primers used in RT-PCR

|               |                                 |
|---------------|---------------------------------|
| Nogo-C2-SB-MO | 5'-ACGCCAAAACAAGCATATACCCTGT-3' |
| Primer-F      | 5'-GAGACTCGTGCCTCCTTCCTCAC-3'   |
| Primer-R1     | 5'-CAACAGCATTCTCTGGCTGAGGG-3'   |
| Primer-R2     | 5'-GCTAAGGGACAGCAGCAGGAAC-3'    |

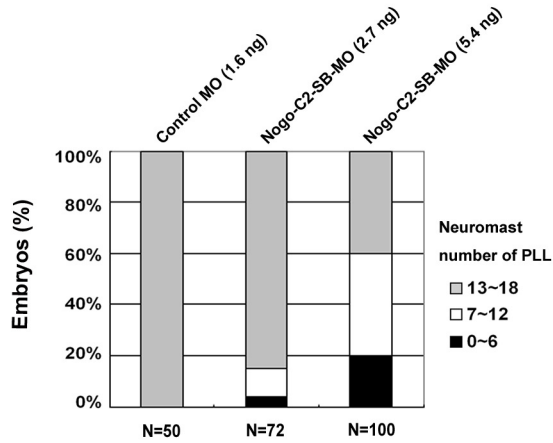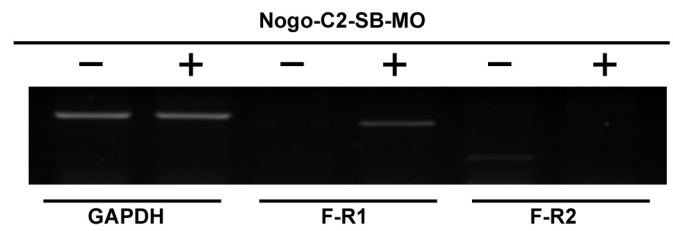

**B**

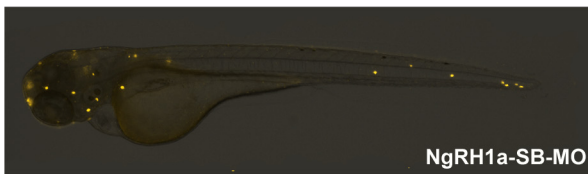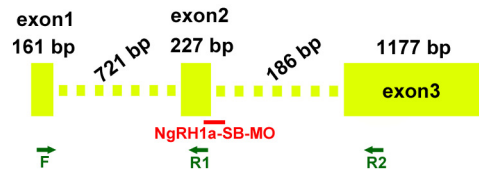

Sequences of NgRH1a-SB-MO and primers used in RT-PCR

|              |                                 |
|--------------|---------------------------------|
| NgRH1a-SB-MO | 5'-ATATAAAGTTCCTTACCTGTGTGCC-3' |
| Primer-F     | 5'-GAGCATCAGCGGAGATAGCAGAG-3'   |
| Primer-R1    | 5'-CCCACTCTCAGTTCAGTAATGCCG-3'  |
| Primer-R2    | 5'-AGGCTCTGGAGCTTCTCTAGGCC-3'   |

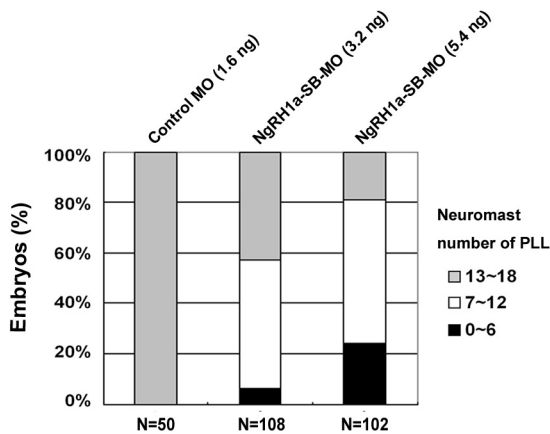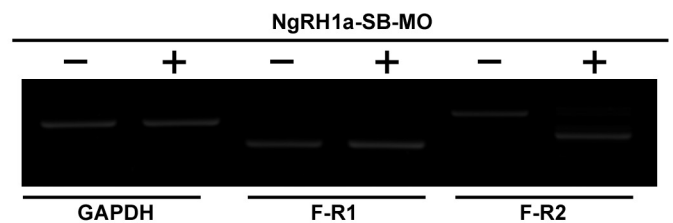

**Figure S5**
